# Supplementary material for: Elastic carbon nanotube straight yarns embedded with helical loops
Source: Royal Society of Chemistry journal article supplement (doi:10.1039/c3nr33633f), 2013-01-01
Supplement: c3nr33633f.pdf [file c3nr33633f.pdf]

## Elastic Carbon Nanotube Straight Yarns Embedded with Helical Loops

Yuanyuan Shang,<sup>1,2</sup> Yibin Li,<sup>1\*</sup> Xiaodong He,<sup>1</sup> Luhui Zhang,<sup>2</sup> Zhen Li,<sup>3</sup> Peixu Li,<sup>3</sup> Enzheng Shi,<sup>2</sup> Shiting Wu,<sup>2</sup> Anyuan Cao<sup>2\*</sup>

<sup>1</sup> Centre for Composite Materials and Structures, Harbin Institute of Technology, Harbin 150080, P. R. China

<sup>2</sup> Department of Materials Science and Engineering, College of Engineering, Peking University, Beijing 100871, P. R. China

<sup>3</sup> Key Laboratory for Advanced Materials Processing Technology and Department of Mechanical Engineering, Tsinghua University, Beijing 100084, P. R. China

### Supplementary Information (Figure S1)

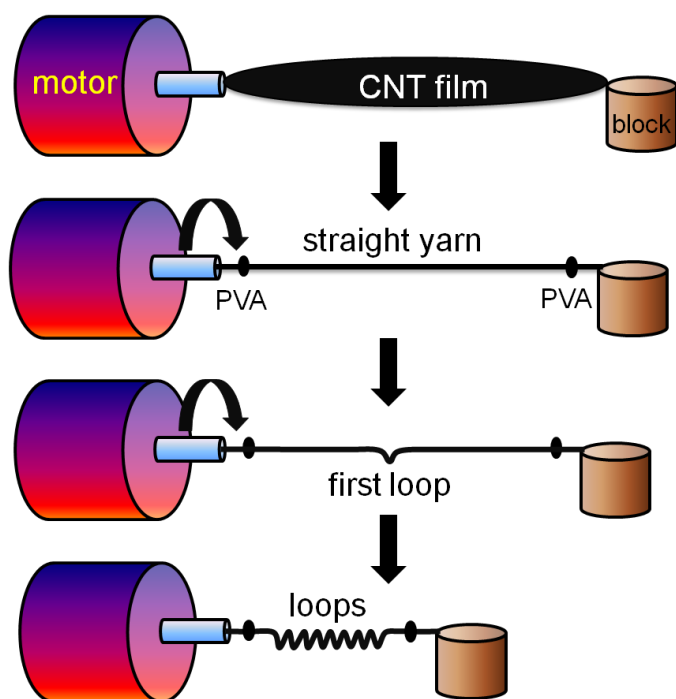

**Figure S1.** Illustration of the spinning process for fabrication of partial-helical yarns, which involves 1) spinning a CNT film into straight yarn, 2) nucleation of the first loop in the middle of the yarn at the position defined by two PVA droplets applied to the yarn, and 3) formation of a helical segment consisting of controlled number of loops by continued over-twisting process.
